# Supplementary material for: Fully biobased thermoplastic elastomers: synthesis and characterization of poly(l-lactide)-b-polymyrcene-b-poly(l-lactide) triblock copolymers
Source: Royal Society of Chemistry journal article supplement (doi:10.1039/c6ra08689f), 2016-01-01
Supplement: c6ra08689f1.pdf [file c6ra08689f1.pdf]

# Fully biobased thermoplastic elastomers: synthesis and characterization of poly(L-lactide)-b-polymyrcene-b-poly(L-lactide) triblock copolymers

Cheng Zhou<sup>†</sup>, Zhiyong Wei<sup>†</sup>, Xuefei Lei, Yang Li<sup>\*</sup>

*State Key Laboratory of Fine Chemicals, Department of Polymer Science and  
Materials, School of Chemical Engineering, Dalian University of Technology, Dalian  
116024, China.*

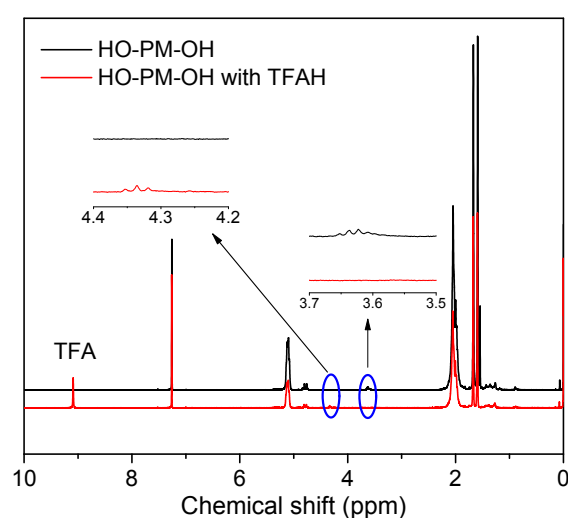

Fig. S1 <sup>1</sup>H-NMR spectrum of OH-PM-OH that treated with or without THFA

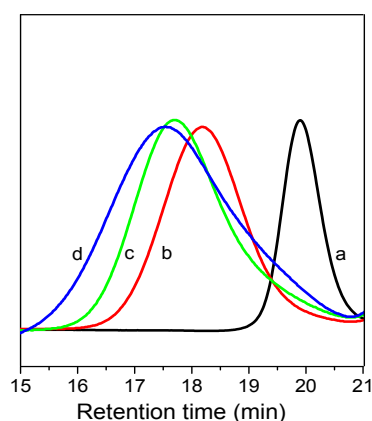

Fig. S2 GPC curves of PLLA-b-PM-b-PLLA triblock copolymers: (a) OH-PM-OH (b)

<sup>†</sup> C.Z. and Z.W. contributed equally to this work as co-first authors.

<sup>\*</sup> Corresponding author.

*E-mail address:* liyang@dlut.edu.cn (Y. Li)

PLLA-b-PM-b-PLLA (200) (c) PLLA-b-PM-b-PLLA (300) and (d) PLLA-b-PM-b-PLLA (400)

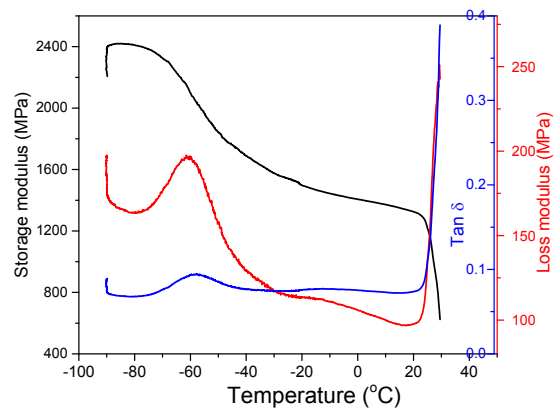

Fig. S3 Storage modulus, Loss modulus and tan delta versus temperature for PLLA-b-PM-b-PLLA (300)

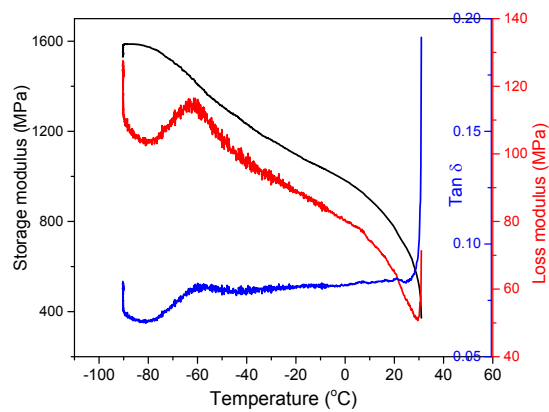

Fig. S4 Storage modulus, Loss modulus and tan delta versus temperature for PLLA-b-PM-b-PLLA (400)
